# Supplementary material for: Estimation of Water Quality Parameters in Oligotrophic Coastal Waters Using Uncrewed-Aerial-Vehicle-Obtained Hyperspectral Data
Source: MDPI journal article supplement (doi:10.3390/jmse11102026), 2023-10-22
Supplement: s1 [file s1]

# Supplementary Materials: Estimation of water quality parameters in oligotrophic coastal waters using UAV-obtained hyperspectral data

Morena Galešić Divić <sup>1\*</sup>, Marija Kvesić Ivanković <sup>2,3</sup> Vladimir Divić <sup>1</sup>, Mak Kišević <sup>2</sup>, Marko Panić <sup>4</sup>, Predrag Lugonja <sup>4</sup>, Vladimir Crnojević <sup>4</sup> and Roko Andričević <sup>1,2</sup>

## 1. Sampling locations and field campaign conditions

Field campaigns consist of 32 measurement points considered for the analysis due to their overlap with the UAV overflight and depicted with a red polyline in Figure S1. Details of field conditions can be found in Table S1 where river flow corresponds to weekly averaged data, while wind speed refers to hourly averaged data.

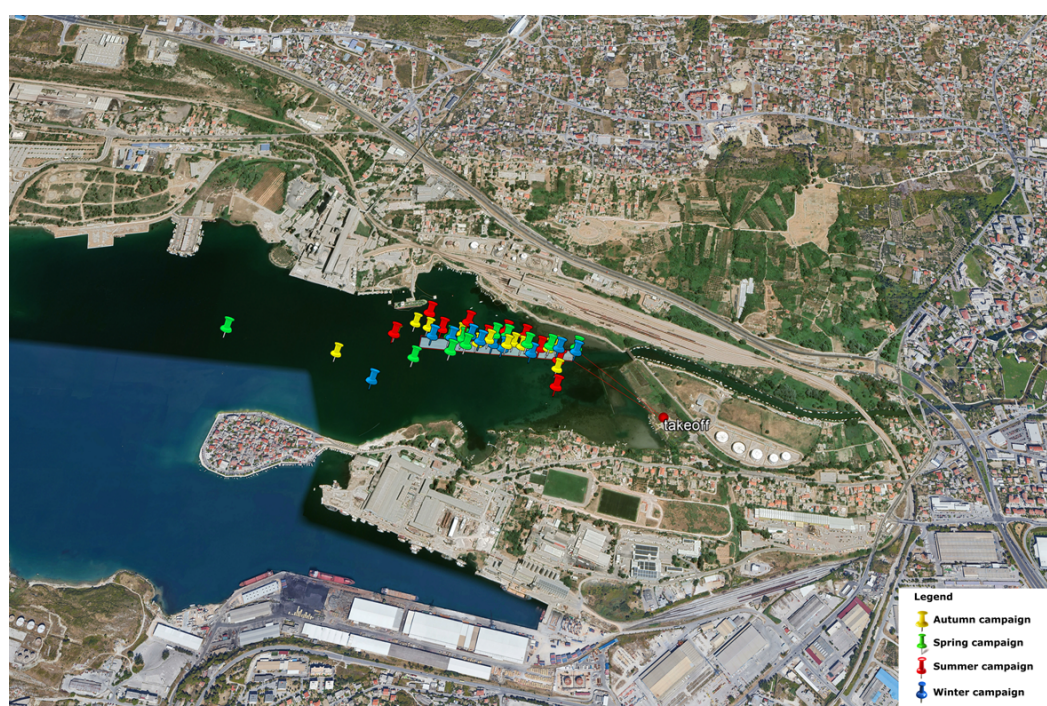

**Figure S1.** Sampling locations with the red polyline indicating flight path.

**Table S1.** Environmental conditions for field campaigns.

| Field campaign date | River flow [m <sup>3</sup> /s] | Wind speed [m/s] | Wind direction | Air temperature [C°] | Humidity [%] | Sentinel-2 overpass date |
|---------------------|--------------------------------|------------------|----------------|----------------------|--------------|--------------------------|
| 25.06.2021.         | 4.1                            | 3.1              | southwest      | 30                   | 45           | 26.06.2021.              |
| 02.11.2021.         | 4.3                            | 5.6              | northwest      | 19                   | 60           | 29.10.2021.              |
| 03.03.2022.         | 7.6                            | 1.7              | east-southeast | 11                   | 30           | 03.03.2022.              |
| 27.04.2022.         | 6.1                            | 3.1              | southwest      | 20                   | 56           | 27.04.2022.              |

## 2. Sensitivity analysis of hyperspectral data

Different preprocessing options for noise and scatter removal were tested, as mentioned in the Data processing sections. The same accuracy assessment was provided for reflectance data without any smoothing (RAW dataset), SG dataset with Savitzky-Golay filter (window 15 and 3rd-order polynomial) and the dataset containing both filtered and

normalized reflectance (SG SNV dataset). Results are given for tested existing algorithms for *Chl a* in Table S2, TUR in Table S3 and CDOM in Table S4, respectively.

**Table S2.** Performance of hyperspectral reflectance datasets with different levels of preprocessing for *Chl a* evaluation using 32 ground truth points.

| RAW dataset              |                      |        |        |         |         |             |
|--------------------------|----------------------|--------|--------|---------|---------|-------------|
| Algorithm                | Regression           | $R^2$  | RMSE   | APD (%) | RPD (%) | HS bands    |
| $\hat{\theta}_{Chl a}^1$ | $y = 0.03x + 0.40$   | 0.4375 | 0.2202 | 25.5151 | 10.5104 | 700,655     |
| $\hat{\theta}_{Chl a}^2$ | $y = 1.19x - 0.27$   | 0.1379 | 0.2749 | 39.8458 | 19.2964 | 432,562     |
| $\hat{\theta}_{Chl a}^3$ | $y = 0.65x + 0.10$   | 0.0468 | 0.2891 | 43.7987 | 21.1794 | 467,562     |
| $\hat{\theta}_{Chl a}^4$ | $y = 0.09x + 1.15$   | 0.5035 | 0.2086 | 24.8139 | 8.0996  | 680,660     |
| $\hat{\theta}_{Chl a}^5$ | $y = -0.004x + 0.72$ | 0.0002 | 0.2961 | 45.267  | 22.1892 | 498,518     |
| $\hat{\theta}_{Chl a}^6$ | $y = 2.06x + 1.13$   | 0.4658 | 0.2164 | 25.4393 | 10.0728 | 702,649     |
| $\hat{\theta}_{Chl a}^7$ | $y = 0.05x + 0.63$   | 0.3821 | 0.2328 | 30.4758 | 12.1707 | 677,664     |
| $\hat{\theta}_{Chl a}^8$ | $y = 1.25x - 0.08$   | 0.4915 | 0.2111 | 23.9894 | 9.4523  | 708,649     |
| $\hat{\theta}_{Chl a}^9$ | $y = 1.54x + 1.14$   | 0.4529 | 0.21   | 27.4971 | 10.9558 | 655,711,854 |
| SG SNV dataset           |                      |        |        |         |         |             |
| Algorithm                | Regression           | $R^2$  | RMSE   | APD (%) | RPD (%) | S2 bands    |
| $\hat{\theta}_{Chl a}^1$ | $y = 0.05x + 0.27$   | 0.3782 | 0.2335 | 30.8434 | 12.1893 | 700,655     |
| $\hat{\theta}_{Chl a}^2$ | $y = 0.88x + 0.0005$ | 0.0781 | 0.2843 | 42.5374 | 20.8805 | 432,562     |
| $\hat{\theta}_{Chl a}^3$ | $y = 0.72x + 0.03$   | 0.0687 | 0.2858 | 43.2213 | 20.8812 | 467,562     |
| $\hat{\theta}_{Chl a}^4$ | $y = 0.09x + 1.10$   | 0.3305 | 0.2423 | 32.4618 | 13.1433 | 680,660     |
| $\hat{\theta}_{Chl a}^5$ | $y = -0.0x + 0.86$   | 0.0673 | 0.286  | 43.9063 | 20.7531 | 498,518     |
| $\hat{\theta}_{Chl a}^6$ | $y = 2.77x + 1.29$   | 0.3575 | 0.2374 | 31.4312 | 12.6041 | 702,649     |
| $\hat{\theta}_{Chl a}^7$ | $y = 0.04x + 0.83$   | 0.251  | 0.2563 | 36.0757 | 15.3286 | 677,664     |
| $\hat{\theta}_{Chl a}^8$ | $y = 1.69x - 0.29$   | 0.3043 | 0.247  | 33.6407 | 13.9456 | 708,649     |
| $\hat{\theta}_{Chl a}^9$ | $y = 2.02x + 1.24$   | 0.4183 | 0.2258 | 30.7807 | 11.0438 | 655,711,854 |
| SG dataset               |                      |        |        |         |         |             |
| Algorithm                | Regression           | $R^2$  | RMSE   | APD (%) | RPD (%) | S2 bands    |
| $\hat{\theta}_{Chl a}^1$ | $y = 0.03x + 0.38$   | 0.4612 | 0.2174 | 25.1206 | 10.3064 | 700,655     |
| $\hat{\theta}_{Chl a}^2$ | $y = 1.20x - 0.28$   | 0.1437 | 0.274  | 39.7642 | 19.2927 | 432,562     |
| $\hat{\theta}_{Chl a}^3$ | $y = 0.76x - 0.02$   | 0.0722 | 0.2852 | 42.7849 | 20.6709 | 467,562     |
| $\hat{\theta}_{Chl a}^4$ | $y = 0.10x + 1.10$   | 0.5773 | 0.1925 | 21.2113 | 6.6163  | 680,660     |
| $\hat{\theta}_{Chl a}^5$ | $y = -0.06x + 0.85$  | 0.0481 | 0.2889 | 44.2392 | 21.1015 | 498,518     |
| $\hat{\theta}_{Chl a}^6$ | $y = 2.07x + 1.11$   | 0.4799 | 0.2135 | 24.9076 | 9.7163  | 702,649     |
| $\hat{\theta}_{Chl a}^7$ | $y = 0.06x + 0.83$   | 0.5941 | 0.1886 | 21.5512 | 5.99    | 677,664     |
| $\hat{\theta}_{Chl a}^8$ | $y = 1.31x - 0.11$   | 0.4803 | 0.2135 | 24.3119 | 9.7059  | 708,649     |
| $\hat{\theta}_{Chl a}^9$ | $y = 1.72x + 1.17$   | 0.4633 | 0.2169 | 26.1958 | 10.651  | 655,711,854 |

**Table S3.** Performance of hyperspectral reflectance datasets with different levels of preprocessing for TUR evaluation using 32 ground truth points.

| RAW dataset              |                                   |        |        |         |         |          |
|--------------------------|-----------------------------------|--------|--------|---------|---------|----------|
| Algorithm                | Regression                        | $R^2$  | RMSE   | APD (%) | RPD (%) | HS bands |
| $\tilde{\theta}_{TUR}^1$ | $y = 0.05x + 2.05$                | 0.0172 | 0.8152 | 26.7126 | 11.2505 | 660      |
| $\tilde{\theta}_{TUR}^2$ | $y = 0.002x + 2.18$               | 0.0024 | 0.8213 | 27.1614 | 11.5237 | 868      |
| $\tilde{\theta}_{TUR}^3$ | $y = 0.11x + 1.94$                | 0.0188 | 0.8145 | 27.2474 | 11.3504 | 863,662  |
| $\tilde{\theta}_{TUR}^4$ | $y = -2.39 \cdot 10^{-4}x + 2.37$ | 0.006  | 0.8198 | 27.3952 | 11.6292 | 784,772  |
| SG SNV dataset           |                                   |        |        |         |         |          |
| Algorithm                | Regression                        | $R^2$  | RMSE   | APD (%) | RPD (%) | S2 bands |
| $\tilde{\theta}_{TUR}^1$ | $y = 0.04x + 4.35$                | 0.0152 | 0.816  | 26.2873 | 11.3474 | 660      |
| $\tilde{\theta}_{TUR}^2$ | $y = -4.23 \cdot 10^{-6}x + 2.23$ | 0.0008 | 0.822  | 27.3881 | 11.5819 | 868      |
| $\tilde{\theta}_{TUR}^3$ | $y = 0.19x + 1.56$                | 0.0844 | 0.7868 | 24.6546 | 10.1796 | 863,662  |
| $\tilde{\theta}_{TUR}^4$ | $y = -3.47 \cdot 10^{-4}x + 2.16$ | 0.0694 | 0.7932 | 26.2756 | 10.4028 | 784,772  |
| SG dataset               |                                   |        |        |         |         |          |
| Algorithm                | Regression                        | $R^2$  | RMSE   | APD (%) | RPD (%) | S2 bands |
| $\tilde{\theta}_{TUR}^1$ | $y = 0.52x + 2.05$                | 0.0175 | 0.8151 | 26.6984 | 11.2439 | 660      |
| $\tilde{\theta}_{TUR}^2$ | $y = 0.003x + 2.17$               | 0.004  | 0.8206 | 27.1284 | 11.4889 | 868      |
| $\tilde{\theta}_{TUR}^3$ | $y = 0.09x + 1.99$                | 0.0133 | 0.8168 | 27.3662 | 11.4465 | 863,662  |
| $\tilde{\theta}_{TUR}^4$ | $y = -0.001x + 2.24$              | 0.093  | 0.7831 | 26.522  | 10.1447 | 784,772  |

**Table S4.** Performance of hyperspectral reflectance datasets with different levels of preprocessing for CDOM evaluation using 32 ground truth points.

| RAW dataset               |                     |        |        |         |         |          |
|---------------------------|---------------------|--------|--------|---------|---------|----------|
| Algorithm                 | Regression          | $R^2$  | RMSE   | APD (%) | RPD (%) | HS bands |
| $\tilde{\theta}_{CDOM}^1$ | $y = -0.43x + 0.66$ | 0.0133 | 0.324  | 88.5857 | 61.5671 | 677,516  |
| $\tilde{\theta}_{CDOM}^2$ | $y = 7.23x - 0.15$  | 0.0318 | 0.3209 | 89.0914 | 63.6139 | 525,562  |
| $\tilde{\theta}_{CDOM}^3$ | $y = -0.99x + 0.65$ | 0.0135 | 0.324  | 88.5453 | 61.3957 | 461,677  |
| $\tilde{\theta}_{CDOM}^4$ | $y = -0.17x + 0.64$ | 0.0254 | 0.322  | 88.5961 | 61.2461 | 576,662  |
| $\tilde{\theta}_{CDOM}^5$ | $y = 6.50x - 0.48$  | 0.0384 | 0.3199 | 83.0367 | 57.0468 | 443,461  |
| SG SNV dataset            |                     |        |        |         |         |          |
| Algorithm                 | Regression          | $R^2$  | RMSE   | APD (%) | RPD (%) | S2 bands |
| $\tilde{\theta}_{CDOM}^1$ | $y = -0.62x + 0.68$ | 0.0027 | 0.3257 | 89.4496 | 62.2277 | 677,516  |
| $\tilde{\theta}_{CDOM}^2$ | $y = 15.17x - 0.95$ | 0.1243 | 0.3052 | 84.6498 | 58.8787 | 525,562  |
| $\tilde{\theta}_{CDOM}^3$ | $y = -0.92x + 0.63$ | 0.0014 | 0.326  | 89.8084 | 62.5381 | 461,677  |
| $\tilde{\theta}_{CDOM}^4$ | $y = -0.74x + 0.70$ | 0.0235 | 0.3223 | 86.9412 | 60.3223 | 576,662  |
| $\tilde{\theta}_{CDOM}^5$ | $y = 10.65x - 1.15$ | 0.0941 | 0.3104 | 72.1338 | 48.3684 | 443,461  |
| SG dataset                |                     |        |        |         |         |          |
| Algorithm                 | Regression          | $R^2$  | RMSE   | APD (%) | RPD (%) | S2 bands |
| $\tilde{\theta}_{CDOM}^1$ | $y = -0.49x + 0.67$ | 0.0164 | 0.3235 | 88.1263 | 61.1435 | 677,516  |
| $\tilde{\theta}_{CDOM}^2$ | $y = 15.25x - 0.96$ | 0.1244 | 0.3052 | 84.1851 | 58.6932 | 525,562  |
| $\tilde{\theta}_{CDOM}^3$ | $y = -1.15x + 0.66$ | 0.018  | 0.3232 | 88.0562 | 60.9208 | 461,677  |
| $\tilde{\theta}_{CDOM}^4$ | $y = -0.17x + 0.64$ | 0.0271 | 0.3217 | 88.3406 | 60.9985 | 576,662  |
| $\tilde{\theta}_{CDOM}^5$ | $y = 12.07x - 1.35$ | 0.1015 | 0.3092 | 72.6353 | 48.61   | 443,461  |

### 3. Comparison of UAV and satellite obtained data

The SNV-processed reflectance for both satellite and UAV data are presented in Figure S2. Point marks in satellite data indicate the central wavelength of corresponding bands.

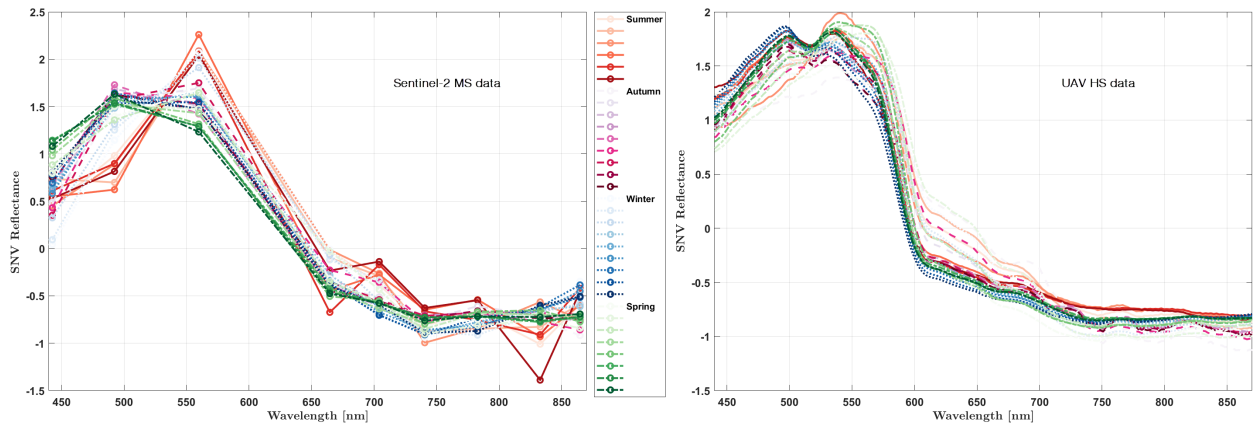

**Figure S2.** Comparison of normalized reflectance data obtained from Sentinel MSI (left panel) and UAV- mounted hyperspectral camera (right panel).

### 4. Statistical evaluation for tested algorithms

The performance of existing algorithms has been assessed by calculating the coefficient of determination ( $R^2$ ), the root mean square error (RMSE), the absolute percentage difference (APD), and the relative percentage difference (RPD) for each of the algorithm (where applicable) and corresponding water quality parameter. Results are presented in the following tables.

**Table S5.** Performance summary of selected 9 algorithms for the *Chl a* derived from UAV HS and UAV MS datasets in comparison to 32 *in-situ* measurements.

| UAV HS                   |                     |        |        |         |         |             |
|--------------------------|---------------------|--------|--------|---------|---------|-------------|
| Algorithm                | Regression          | $R^2$  | RMSE   | APD (%) | RPD (%) | HS bands    |
| $\bar{\theta}_{Chl a}^1$ | $y = 0.03x + 0.38$  | 0.4612 | 0.2174 | 25.1206 | 10.3064 | 700,655     |
| $\bar{\theta}_{Chl a}^2$ | $y = 1.20x - 0.28$  | 0.1437 | 0.274  | 39.7642 | 19.2927 | 432,562     |
| $\bar{\theta}_{Chl a}^3$ | $y = 0.76x - 0.02$  | 0.0722 | 0.2852 | 42.7849 | 20.6709 | 467,562     |
| $\bar{\theta}_{Chl a}^4$ | $y = 0.10x + 1.10$  | 0.5773 | 0.1925 | 21.2113 | 6.6163  | 680,660     |
| $\bar{\theta}_{Chl a}^5$ | $y = -0.06x + 0.85$ | 0.0481 | 0.2889 | 44.2392 | 21.1015 | 498,518     |
| $\bar{\theta}_{Chl a}^6$ | $y = 2.07x + 1.11$  | 0.4799 | 0.2135 | 24.9076 | 9.7163  | 702,649     |
| $\bar{\theta}_{Chl a}^7$ | $y = 0.06x + 0.83$  | 0.5941 | 0.1886 | 21.5512 | 5.99    | 677,664     |
| $\bar{\theta}_{Chl a}^8$ | $y = 1.31x - 0.11$  | 0.4803 | 0.2135 | 24.3119 | 9.7059  | 708,649     |
| $\bar{\theta}_{Chl a}^9$ | $y = 1.72x + 1.17$  | 0.4633 | 0.2169 | 26.1958 | 10.651  | 655;711;854 |
| UAV MS                   |                     |        |        |         |         |             |
| Algorithm                | Regression          | $R^2$  | RMSE   | APD (%) | RPD (%) | S2 bands    |
| $\bar{\theta}_{Chl a}^1$ | $y = 0.03x + 0.38$  | 0.4504 | 0.2195 | 25.6372 | 10.5391 | B5,B4       |
| $\bar{\theta}_{Chl a}^2$ | $y = 1.04x - 0.16$  | 0.0969 | 0.2814 | 41.5835 | 20.3101 | B1,B3       |
| $\bar{\theta}_{Chl a}^3$ | $y = 0.73x - 0.03$  | 0.0515 | 0.2884 | 43.748  | 21.0595 | B2,B3       |
| $\bar{\theta}_{Chl a}^4$ | /                   | /      | /      | /       | /       | B4,B4       |
| $\bar{\theta}_{Chl a}^5$ | /                   | /      | /      | /       | /       | B2,B2       |
| $\bar{\theta}_{Chl a}^6$ | $y = 2.60x + 1.09$  | 0.4597 | 0.2176 | 25.4758 | 10.1877 | B5,B4       |
| $\bar{\theta}_{Chl a}^7$ | /                   | /      | /      | /       | /       | B4,B4       |
| $\bar{\theta}_{Chl a}^8$ | $y = 1.70x - 0.57$  | 0.4544 | 0.2187 | 25.3355 | 10.3945 | B5,B4       |
| $\bar{\theta}_{Chl a}^9$ | $y = 2.40x + 1.12$  | 0.4153 | 0.2264 | 28.2316 | 11.998  | B4,B5,B8a   |

**Table S6.** Summary of 5 tested algorithms for the TUR evaluation using 32 ground truth points.

| UAV HS                   |                      |        |        |         |         |          |
|--------------------------|----------------------|--------|--------|---------|---------|----------|
| Algorithm                | Regression           | $R^2$  | RMSE   | APD (%) | RPD (%) | HS bands |
| $\tilde{\theta}_{TUR}^1$ | $y = 0.52x + 2.05$   | 0.0175 | 0.8151 | 26.6984 | 11.2439 | 660      |
| $\tilde{\theta}_{TUR}^2$ | $y = 0.003x + 2.17$  | 0.004  | 0.8206 | 27.1284 | 11.4889 | 868      |
| $\tilde{\theta}_{TUR}^3$ | $y = 0.09x + 1.99$   | 0.0133 | 0.8168 | 27.3662 | 11.4465 | 863,662  |
| $\tilde{\theta}_{TUR}^4$ | $y = -0.001x + 2.24$ | 0.093  | 0.7831 | 26.522  | 10.1447 | 784,772  |
| Algorithm                | Regression           | $R^2$  | RMSE   | APD (%) | RPD (%) | S2 bands |
| $\tilde{\theta}_{TUR}^1$ | $y = 0.05x + 2.06$   | 0.0158 | 0.8157 | 26.7495 | 11.2725 | B4       |
| $\tilde{\theta}_{TUR}^2$ | $y = 0.003x + 2.17$  | 0.004  | 0.8206 | 27.1273 | 11.4903 | B8a      |
| $\tilde{\theta}_{TUR}^3$ | $y = 0.08x + 2.01$   | 0.0107 | 0.8179 | 27.3192 | 11.48   | B8a,B4   |
| $\tilde{\theta}_{TUR}^4$ | $y = 0.0002x + 2.11$ | 0.0378 | 0.8066 | 27.4884 | 11.073  | B8,B7    |

**Table S7.** Summary of 5 tested algorithms for the CDOM evaluation using 32 ground truth points.

| UAV HS                    |                     |        |        |         |         |          |
|---------------------------|---------------------|--------|--------|---------|---------|----------|
| Algorithm                 | Regression          | $R^2$  | RMSE   | APD (%) | RPD (%) | HS bands |
| $\tilde{\theta}_{CDOM}^1$ | $y = -0.49x + 0.67$ | 0.0164 | 0.3235 | 88.1263 | 61.1435 | 677,516  |
| $\tilde{\theta}_{CDOM}^2$ | $y = 15.25x - 0.96$ | 0.1244 | 0.3052 | 84.1851 | 58.6932 | 525,562  |
| $\tilde{\theta}_{CDOM}^3$ | $y = -1.15x + 0.66$ | 0.018  | 0.3232 | 88.0562 | 60.9208 | 461,677  |
| $\tilde{\theta}_{CDOM}^4$ | $y = -0.17x + 0.64$ | 0.0271 | 0.3217 | 88.3406 | 60.9985 | 576,662  |
| $\tilde{\theta}_{CDOM}^5$ | $y = 12.07x - 1.35$ | 0.1015 | 0.3092 | 72.61   | 48.6099 | 443,461  |
| UAV MS                    |                     |        |        |         |         |          |
| Algorithm                 | Regression          | $R^2$  | RMSE   | APD (%) | RPD (%) | S2 bands |
| $\tilde{\theta}_{CDOM}^1$ | $y = -0.29x + 0.64$ | 0.0062 | 0.3252 | 89.2442 | 62.0692 | B4,B2    |
| $\tilde{\theta}_{CDOM}^2$ | $y = 6.74x - 0.14$  | 0.0585 | 0.3165 | 87.7103 | 62.2816 | B2,B3    |
| $\tilde{\theta}_{CDOM}^3$ | $y = -0.77x + 0.63$ | 0.0075 | 0.3249 | 89.1821 | 61.9696 | B2,B4    |
| $\tilde{\theta}_{CDOM}^4$ | $y = -0.14x + 0.62$ | 0.015  | 0.3237 | 88.9626 | 61.8989 | B3,B4    |
| $\tilde{\theta}_{CDOM}^5$ | $y = 2.87x + 0.02$  | 0.0298 | 0.3213 | 83.8034 | 58.4464 | B1,B2    |

### 5. Visualized performance of different functions implemented in local empirical algorithms

We have tested four simple functions to obtain the water quality parameters based on available combinations of hyperspectral bands. The simple relation between bands was used: the  $\tilde{R}_{Mband}/\tilde{R}_{Nband}$ , where both bands belong to the relevant spectral domain.

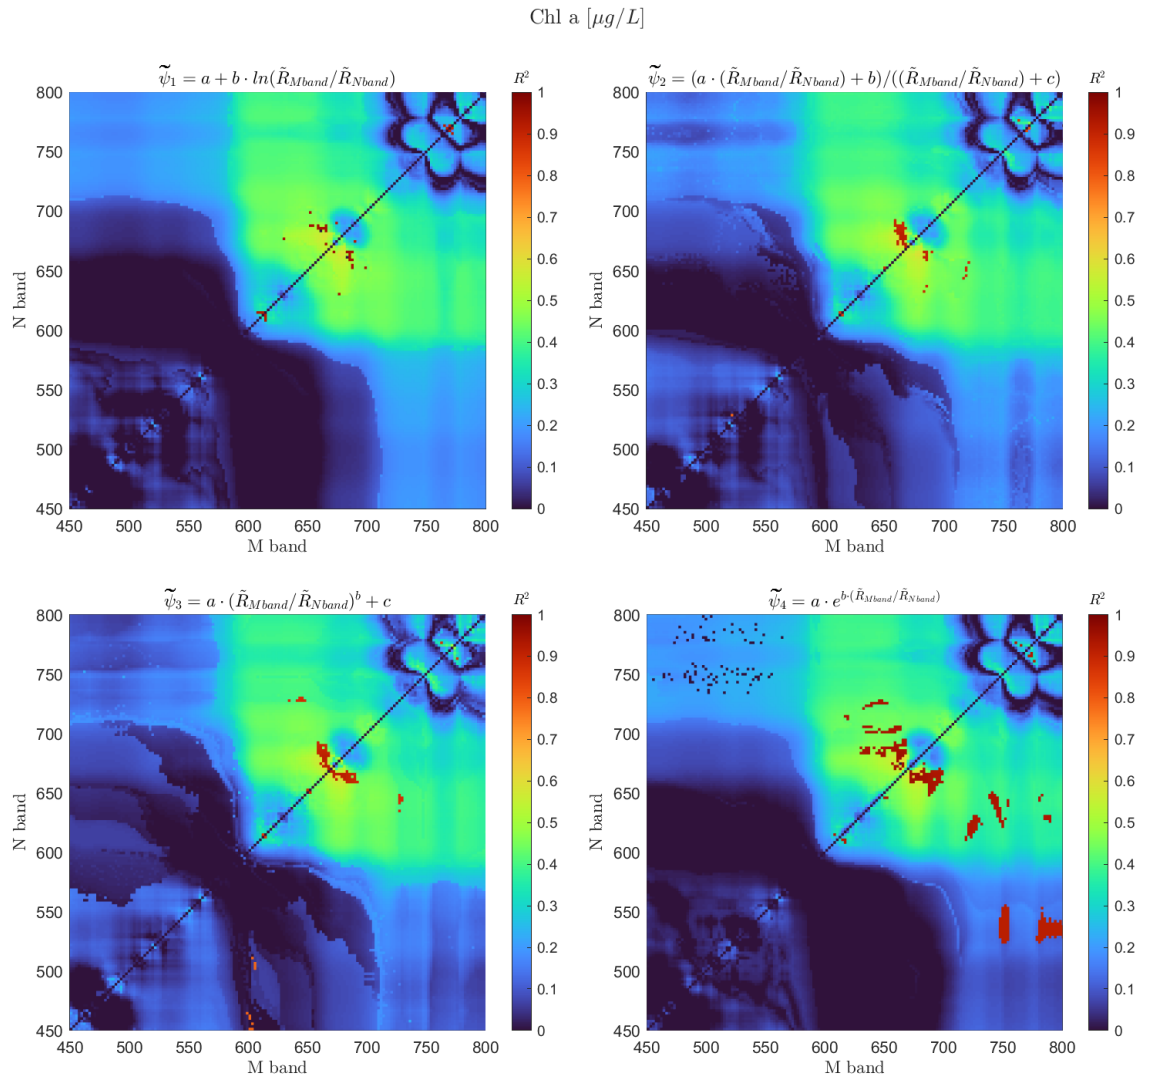

**Figure S3.**  $R^2$  Performance of different functions for *Chl a*.



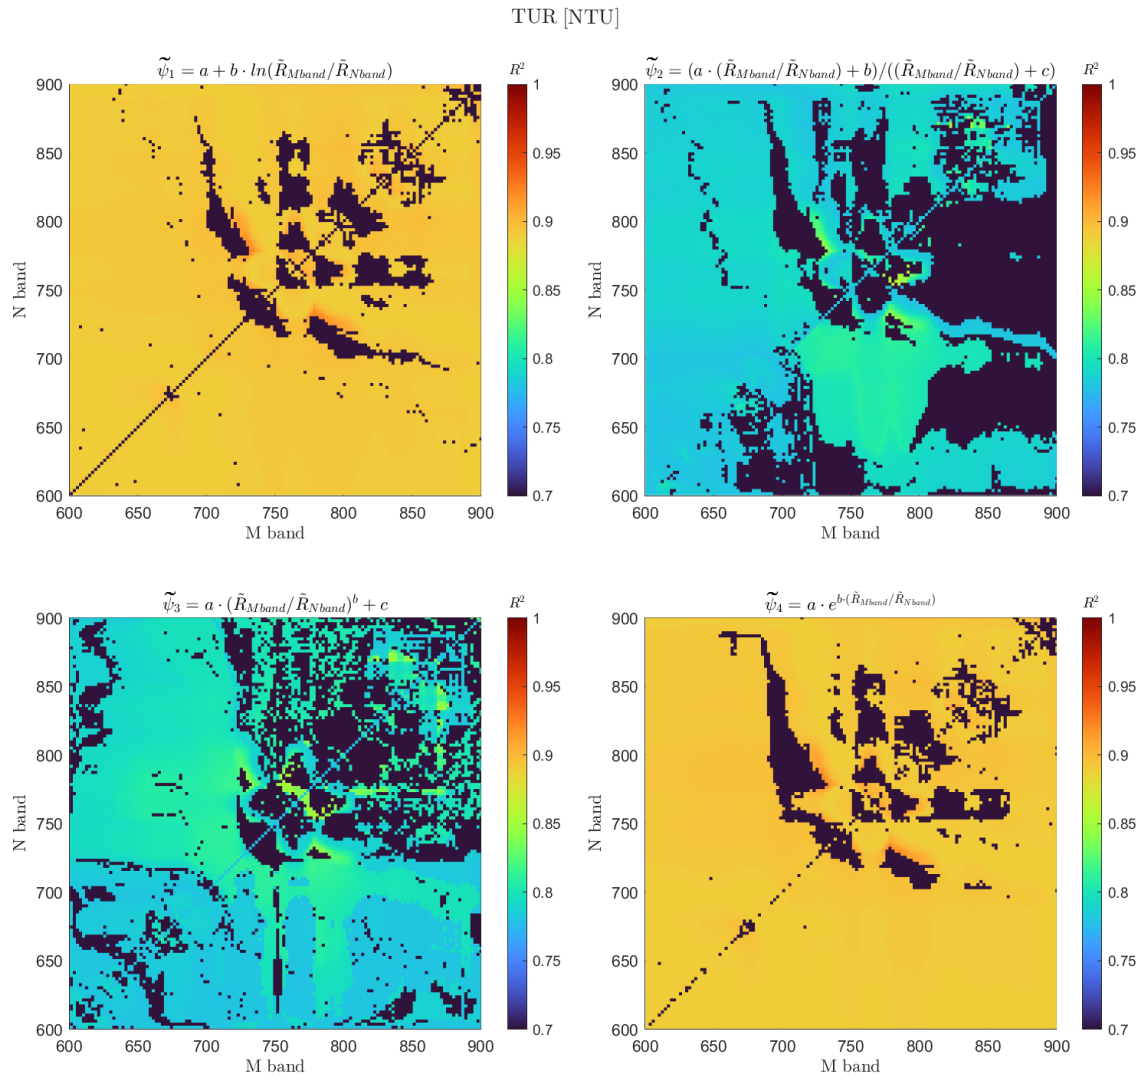

**Figure S4.**  $R^2$  Performance of different functions for TUR.

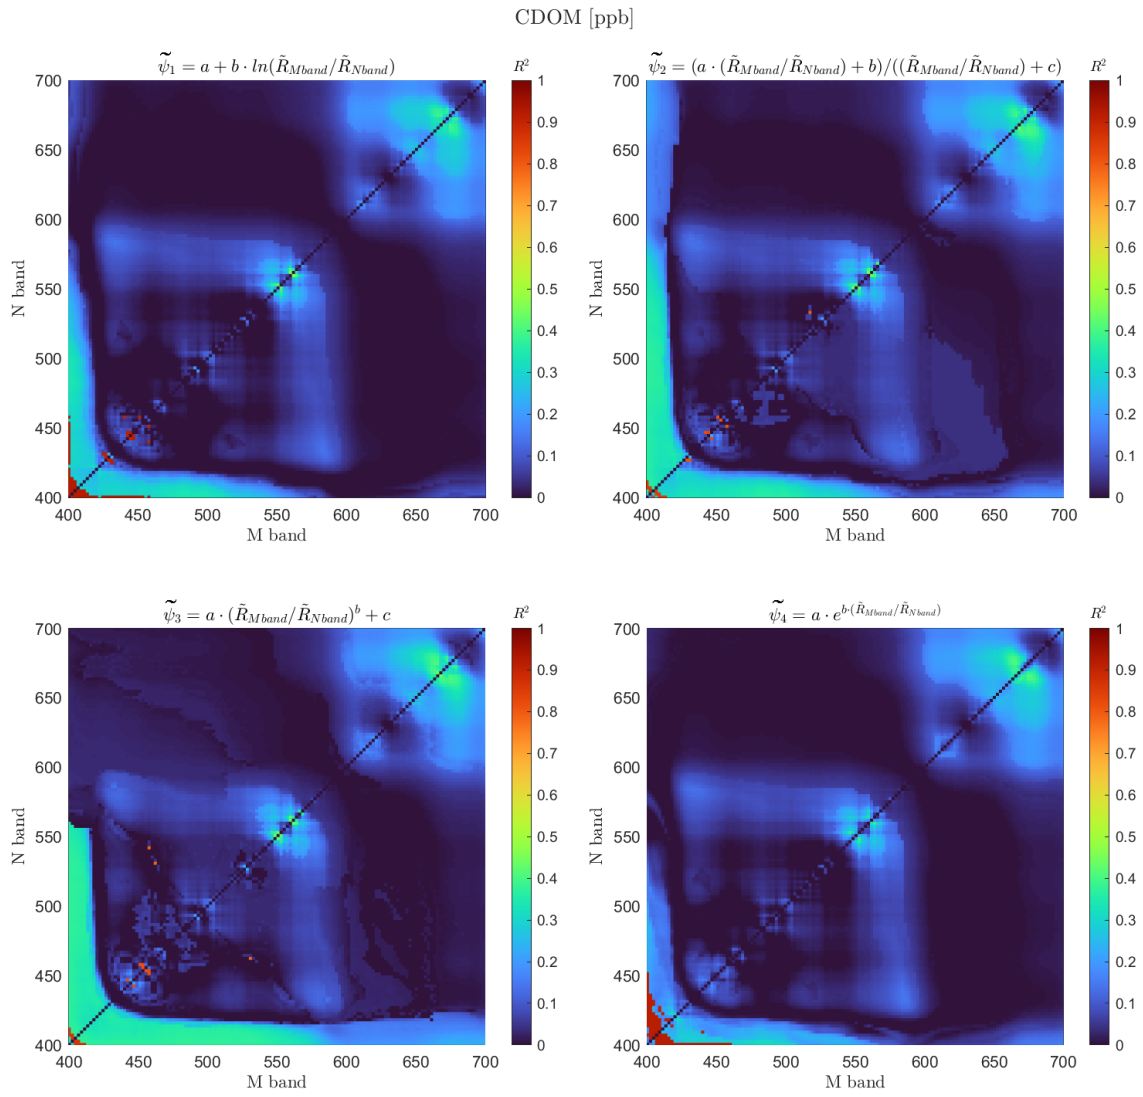

**Figure S5.**  $R^2$  Performance of different functions for CDOM.



## 6. Robust Nonlinear Fitting for Regression Analysis

Adequate regression-based models were obtained using robust nonlinear fitting integrated into the MATLAB computing environment. In this section, we present the impact of utilizing weights ( $w$ ) obtained within the MATLAB Curve Fitting Toolbox with the Least Absolute Residuals (LAR) method. This method serves as a computational alternative to manual outlier removal, chosen to mitigate potential bias and optimize computational resources during the iterative search for the optimal band ratio and regression function.

The following figures illustrate the specific weights and the selected model with automatically detected outliers for three parameters: chlorophyll-*a* (*Chl a*) (Figure S6), turbidity (Figure S7), and colored dissolved organic matter (Figure S8).

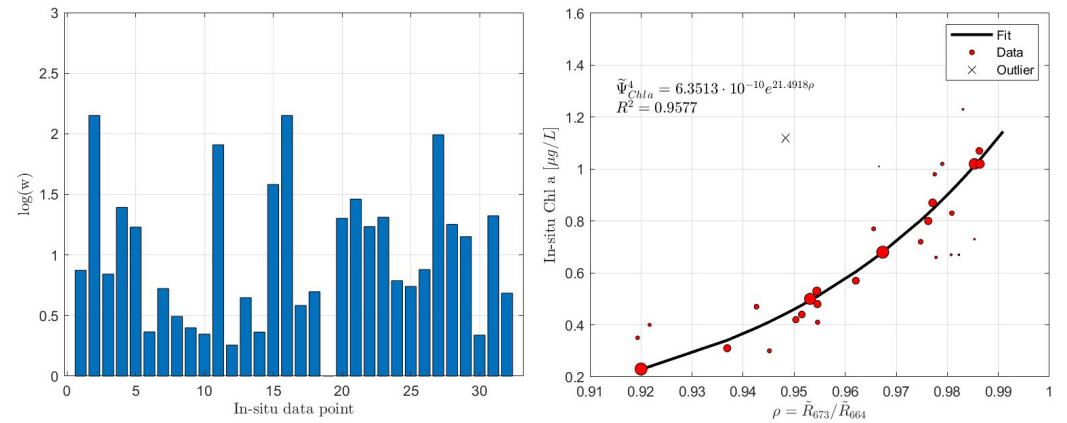

**Figure S6.** Left Panel: Specific weights (for 32 data points) derived from LAR are used to assess the  $R^2$  of the proposed *Chl a* model. Each bar represents the weight of a data point used in the model. Right Panel: Model visualization with data points indicated by circles. The size of each circle corresponds to the specific weight shown in the left panel. One outlier is denoted by cross marker.

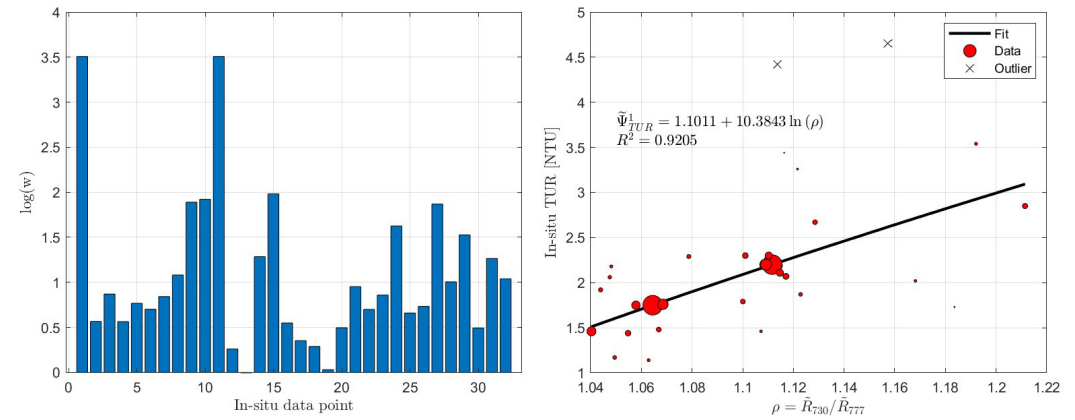

**Figure S7.** Left Panel: Specific weights (for 32 data points) derived from LAR are used to assess the  $R^2$  of the proposed TUR model. Each bar represents the weight of a data point used in the model. Right Panel: Model visualization with data points indicated by circles. The size of each circle corresponds to the specific weight shown in the left panel. Two outliers are marked with cross markers.

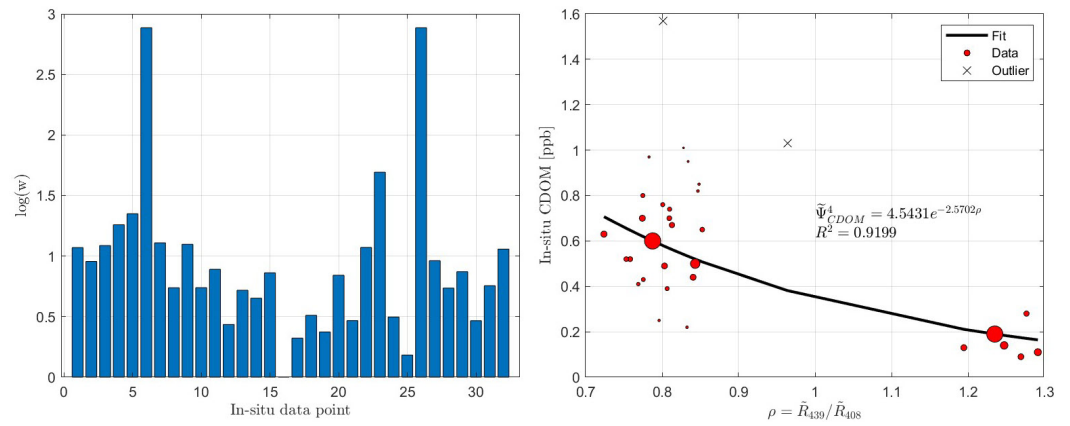

**Figure S8.** Left Panel: Specific weights (for 32 points) derived from LAR are used to assess the  $R^2$  of the proposed CDOM model. Each bar represents the weight of a data point used in the model. Right Panel: Model visualization with data points indicated by circles. Circle sizes correspond to the specific weights shown in the left panel. Two outliers are indicated by cross markers.

## 7. Statistical evaluation for newly proposed regression-based algorithms

Similarly to existing algorithms, the performance of newly proposed regression-based algorithms has been assessed for each algorithm and corresponding water quality parameter. However, among all the possible and conducted combinations, we present only the results of best-performing band ratios for corresponding regression models.

**Table S8.** Statistical summary of regression models with the best performance for *Chl a* retrieval.

| <i>Chl a</i>             |        |             |                |                |               |               |
|--------------------------|--------|-------------|----------------|----------------|---------------|---------------|
| <i>Regression model</i>  | $R^2$  | <i>RMSE</i> | <i>APD (%)</i> | <i>RPD (%)</i> | <i>M band</i> | <i>N band</i> |
| $\tilde{\Psi}_{Chl a}^1$ | 0.9528 | 0.2038      | 21.9418        | -3.7816        | 664           | 671           |
| $\tilde{\Psi}_{Chl a}^2$ | 0.9190 | 0.1821      | 17.5841        | 3.3349         | 664           | 673           |
| $\tilde{\Psi}_{Chl a}^3$ | 0.9175 | 0.1832      | 17.6008        | 3.7347         | 664           | 673           |
| $\tilde{\Psi}_{Chl a}^4$ | 0.9577 | 0.1853      | 17.5460        | 0.3254         | 673           | 664           |

**Table S9.** Statistical summary of regression models with the best performance for TUR retrieval.

| <b>TUR</b>              |        |             |                |                |               |               |
|-------------------------|--------|-------------|----------------|----------------|---------------|---------------|
| <i>Regression model</i> | $R^2$  | <i>RMSE</i> | <i>APD (%)</i> | <i>RPD (%)</i> | <i>M band</i> | <i>N band</i> |
| $\tilde{\Psi}_{TUR}^1$  | 0.9205 | 0.7079      | 19.8099        | 1.4558         | 730           | 777           |
| $\tilde{\Psi}_{TUR}^2$  | 0.8616 | 0.6613      | 21.8016        | 8.9411         | 784           | 755           |
| $\tilde{\Psi}_{TUR}^3$  | 0.8610 | 0.6559      | 21.1616        | 6.2539         | 784           | 753           |
| $\tilde{\Psi}_{TUR}^4$  | 0.9194 | 0.7399      | 18.5130        | -3.5596        | 784           | 728           |

**Table S10.** Statistical summary of regression models with the best performance for CDOM retrieval.

| <b>CDOM</b>             |        |             |                |                |               |               |
|-------------------------|--------|-------------|----------------|----------------|---------------|---------------|
| <i>Regression model</i> | $R^2$  | <i>RMSE</i> | <i>APD (%)</i> | <i>RPD (%)</i> | <i>M band</i> | <i>N band</i> |
| $\tilde{\Psi}_{CDOM}^1$ | 0.9045 | 0.3165      | 49.4806        | 20.1483        | 456           | 439           |
| $\tilde{\Psi}_{CDOM}^2$ | 0.7938 | 0.3160      | 81.2970        | 56.1188        | 516           | 531           |
| $\tilde{\Psi}_{CDOM}^3$ | 0.7889 | 0.3197      | 86.7708        | 61.2583        | 456           | 540           |
| $\tilde{\Psi}_{CDOM}^4$ | 0.9199 | 0.2904      | 39.6592        | 7.9484         | 439           | 408           |
